# Supplementary material
Source: PubMed Central journal article supplement (PMC7470220)
Supplement: Supp_Fig1.pdf [file Supp_Fig1.pdf]

## Supplementary Material

---

**SUPPLEMENTARY FIG. S1.** MALDI-TOF mass spectra of N-linked glycosylation from rat spinal cord samples. Permethylated N-linked glycosylation from (A) control, (B) sham, (C) 3 DPI, and (D) 14 DPI samples derived from the 50% acetonitrile fraction (see Methods section). Structures outside a bracket have not been unequivocally defined. Red  $m/z$  values in (C) 3 DPI, and (D) 14 DPI correspond to N-linked glycosylation found in increased abundance compared with control and sham samples. Non-annotated  $m/z$  values in (B) sham, (C) 3 DPI, and (D) 14 DPI correspond to the same N-linked glycosylation as in the (A) control sample. All molecular ions are  $[M+Na]^+$ . Putative structures are based on composition, tandem MS, and biosynthetic knowledge. DPI, days post-injury; MALDI-TOF, matrix-assisted laser desorption ionization time-of-flight; MS, mass spectrometry.

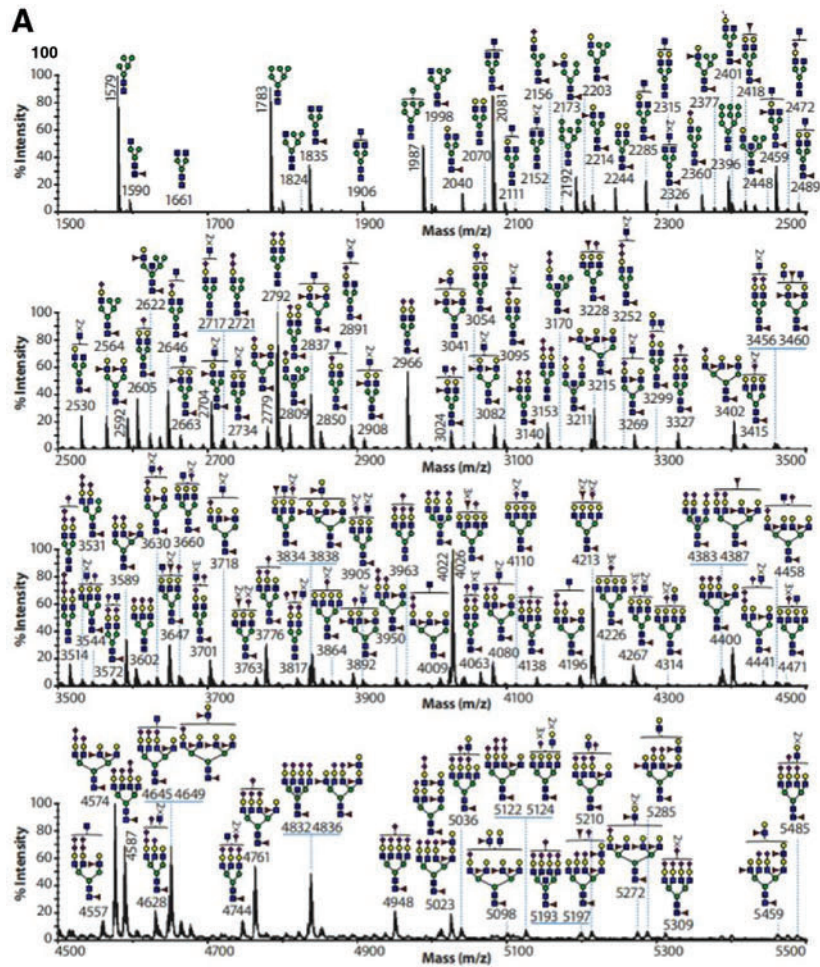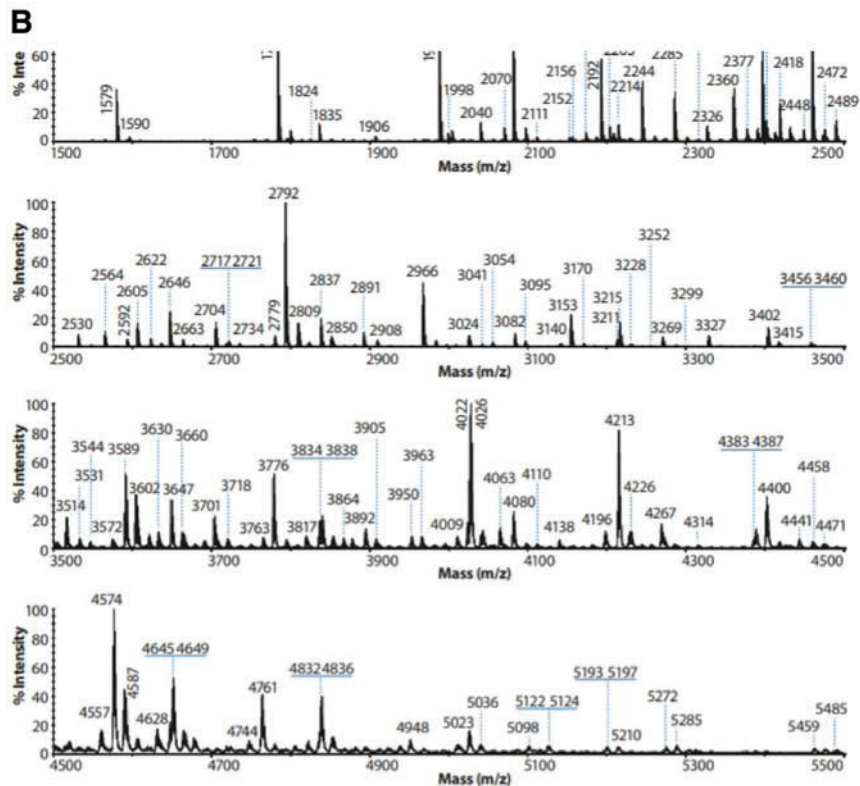

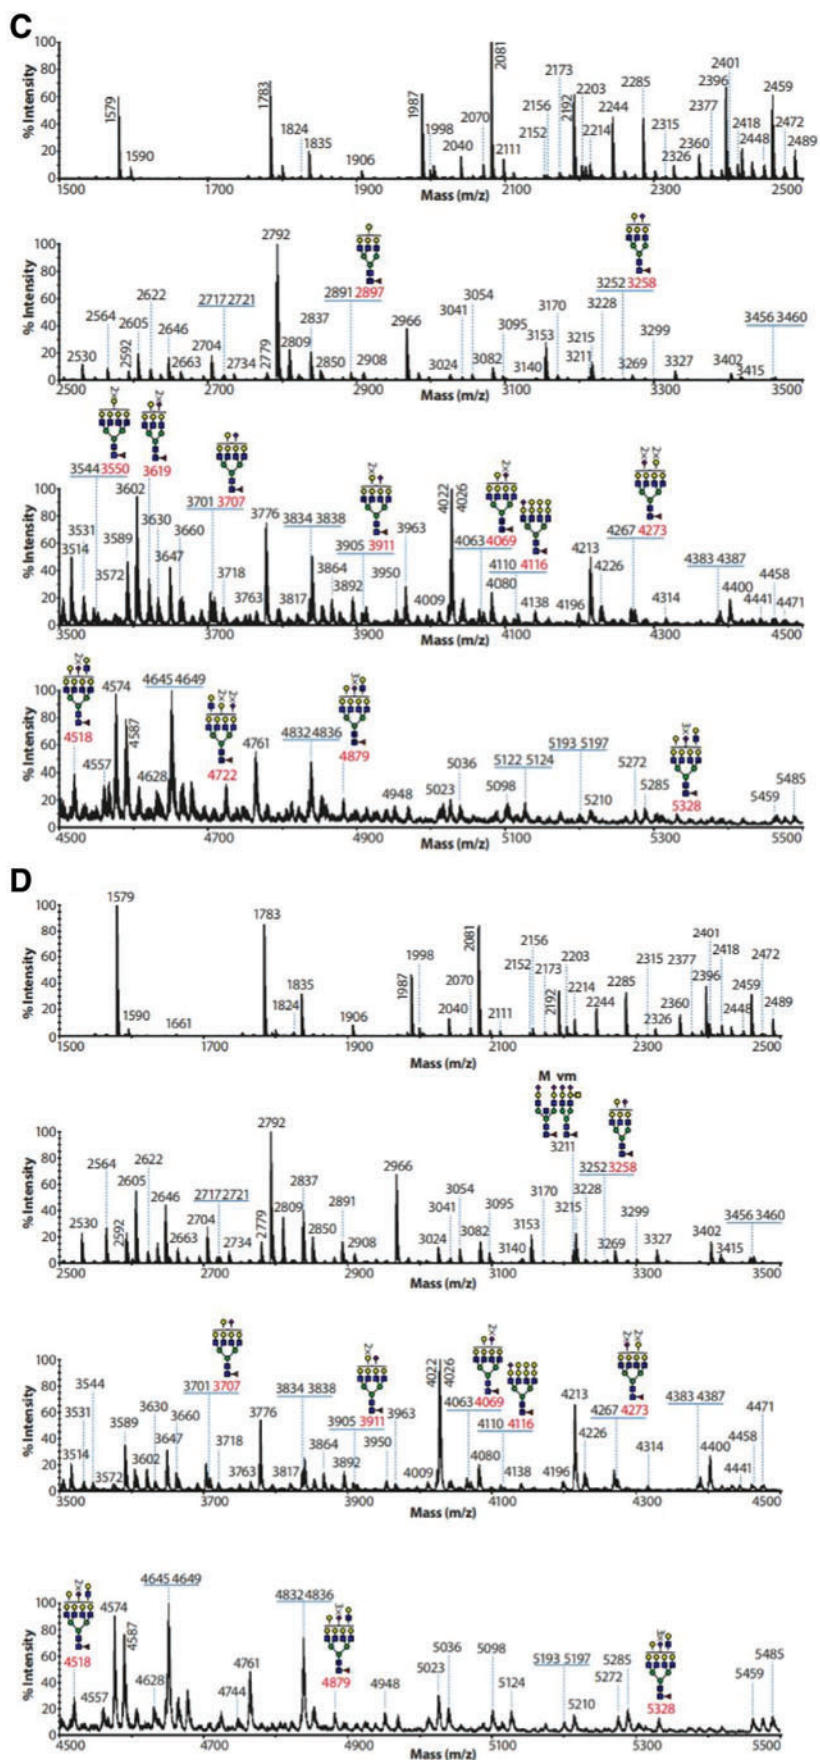

SUPPLEMENTARY FIG. S1. (Continued).
